# Supplementary material for: First hyperpolarizability of H–(BN)N–H oligomers: analysis of geometry, asymmetry and delocalization effectsElectronic Supplementary Information available. See http://www.rsc.org/suppdata/cp/b1/b108044j/
Source: Royal Society of Chemistry journal article supplement (doi:10.1039/b108044j), 2001-12-21
Supplement: tables.pdf [file tables.pdf]

**Table S1** Longitudinal electronic first hyperpolarizability ( $\beta_L^e$ ) of linear H-(BN) $_N$ -H chains as a function of  $\Delta r$  (Å) and  $N$ . These values have been obtained with the HF/6-31G method and are given in au. The extrapolated polymeric values per unit cell are given at the bottom of the table

| $N/\Delta r$ | 0.00     | 0.02       | 0.04       | 0.08        | 0.12        | 0.16        | 0.20        | 0.24        | 0.28        | 0.32        | 0.36        | 0.40        |
|--------------|----------|------------|------------|-------------|-------------|-------------|-------------|-------------|-------------|-------------|-------------|-------------|
| 1            | 59.6     | 58.5       | 57.4       | 55.2        | 53.0        | 50.8        | 48.7        | 46.5        | 44.4        | 42.3        | 40.3        | 38.2        |
| 2            | 323.7    | 299.7      | 277.5      | 237.7       | 203.5       | 174.4       | 149.4       | 128.2       | 110.2       | 94.9        | 81.9        | 70.8        |
| 3            | 816.4    | 726.8      | 646.7      | 510.9       | 402.2       | 315.6       | 246.8       | 192.4       | 149.8       | 116.5       | 90.6        | 70.4        |
| 4            | 1320.9   | 1150.8     | 1000.3     | 749.3       | 553.9       | 403.2       | 288.5       | 202.7       | 139.3       | 93.4        | 60.7        | 37.6        |
| 5            | 1676.9   | 1446.1     | 1239.4     | 891.6       | 620.9       | 415.4       | 264.0       | 156.0       | 81.5        | 32.0        | 0.5         | -18.6       |
| 6            | 1895.8   | 1622.7     | 1373.2     | 946.0       | 611.7       | 361.6       | 183.4       | 63.0        | -13.4       | -58.0       | -81.0       | -90.2       |
| 7            | 2039.6   | 1728.4     | 1439.4     | 938.3       | 545.8       | 257.8       | 60.4        | -64.3       | -134.9      | -167.9      | -176.9      | -172.0      |
| 8            | 2145.8   | 1793.9     | 1463.8     | 887.7       | 439.2       | 117.4       | -93.4       | -216.2      | -275.2      | -291.6      | -282.5      | -260.3      |
| 9            | 2229.6   | 1833.5     | 1459.9     | 806.8       | 303.0       | -49.4       | -269.3      | -385.6      | -428.6      | -424.7      | -394.6      | -353.1      |
| 10           | 2297.0   | 1854.3     | 1435.4     | 703.6       | 145.1       | -235.7      | -461.3      | -567.5      | -591.2      | -564.3      | -511.2      | -448.8      |
| 11           | 2351.6   | 1860.6     | 1395.2     | 583.7       | -28.9       | -436.1      | -665.0      | -758.4      | -760.4      | -708.6      | -630.9      | -546.5      |
| 12           | 2395.9   | 1855.8     | 1343.2     | 451.4       | -214.8      | -647.0      | -877.1      | -955.7      | -934.3      | -856.1      | -752.9      | -645.7      |
| 13           | 2432.2   | 1842.3     | 1282.0     | 309.5       | -409.7      | -865.7      | -1095.6     | -1157.9     | -1111.7     | -1006.1     | -876.4      | -745.9      |
| 14           | 2462.1   | 1821.9     | 1213.7     | 160.4       | -611.4      | -1090.3     | -1318.9     | -1363.7     | -1291.7     | -1157.8     | -1001.2     | -847.0      |
| 15           | 2486.9   | 1796.3     | 1140.0     | 5.7         | -818.3      | -1319.4     | -1545.7     | -1572.2     | -1473.7     | -1310.9     | -1126.8     | -948.6      |
| 16           | 2507.7   | 1766.5     | 1061.9     | -153.3      | -1029.3     | -1552.0     | -1775.3     | -1782.8     | -1657.1     | -1465.0     | -1253.2     | -1050.6     |
| 17           | 2525.4   | 1733.3     | 980.4      | -315.7      | -1243.4     | -1787.3     | -2007.1     | -1995.0     | -1841.7     | -1620.0     | -1380.1     | -1153.0     |
| 18           | 2540.5   | 1697.5     | 896.2      | -480.9      | -1460.1     | -2024.8     | -2240.6     | -2208.5     | -2027.2     | -1775.5     | -1507.4     | -1255.7     |
| 19           | 2553.5   | 1659.6     | 809.8      | -648.3      | -1678.8     | -2264.0     | -2475.5     | -2423.0     | -2213.5     | -1931.6     | -1635.1     | -1358.6     |
| 20           | 2564.8   | 1619.9     | 721.6      | -817.4      | -1899.1     | -2504.6     | -2711.5     | -2638.3     | -2400.4     | -2088.1     | -1763.0     | -1461.7     |
| $\infty$     | $5\pm 7$ | $-44\pm 4$ | $-92\pm 3$ | $-173\pm 3$ | $-224\pm 3$ | $-246\pm 2$ | $-240\pm 1$ | $-219\pm 2$ | $-189\pm 2$ | $-160\pm 3$ | $-130\pm 1$ | $-104\pm 1$ |

**Table S2** Longitudinal electronic first hyperpolarizability ( $\beta_L^e$ ) of linear H-(BN) $_N$ -H chains as a function of  $\Delta r$  (Å) and  $N$ . These values have been obtained with the MP2/6-31G method and are given in au. The extrapolated polymeric values per unit cell are given at the bottom of the table

| $N/\Delta r$ | 0.00      | 0.02         | 0.04        | 0.08         | 0.12         | 0.16         | 0.20         | 0.24         | 0.28         | 0.32         | 0.36        | 0.40        |
|--------------|-----------|--------------|-------------|--------------|--------------|--------------|--------------|--------------|--------------|--------------|-------------|-------------|
| 1            | 18        | 19           | 19          | 20           | 21           | 21           | 22           | 22           | 22           | 22           | 21          | 21          |
| 2            | 283       | 249          | 218         | 165          | 123          | 90           | 63           | 42           | 26           | 14           | 5           | -2          |
| 3            | 1086      | 900          | 740         | 485          | 298          | 160          | 61           | -9           | -56          | -87          | -106        | -115        |
| 4            | 2218      | 1777         | 1404        | 825          | 414          | 129          | -64          | -189         | -263         | -302         | -316        | -313        |
| 5            | 3176      | 2492         | 1910        | 997          | 357          | -76          | -352         | -514         | -594         | -619         | -608        | -575        |
| 6            | 3785      | 2917         | 2160        | 952          | 103          | -457         | -794         | -967         | -1027        | -1016        | -959        | -880        |
| 7            | 4159      | 3130         | 2215        | 732          | -314         | -985         | -1360        | -1521        | -1539        | -1467        | -1352       | -1214       |
| 8            | 4419      | 3226         | 2148        | 382          | -857         | -1626        | -2020        | -2149        | -2106        | -1964        | -1773       | -1567       |
| 9            | 4625      | 3252         | 2000        | -62          | -1494        | -2350        | -2752        | -2833        | -2714        | -2486        | -2213       | -1933       |
| 10           | 4795      | 3230         | 1794        | -575         | -2202        | -3141        | -3535        | -3556        | -3349        | -3028        | -2666       | -2308       |
| 11           | 4938      | 3171         | 1544        | -1141        | -2963        | -3981        | -4358        | -4308        | -4006        | -3585        | -3129       | -2688       |
| 12           | 5056      | 3068         | 1259        | -1747        | -3764        | -4851        | -5210        | -5083        | -4679        | -4122        | -3598       | -3074       |
| 13           | 5154      | 2949         | 947         | -2385        | -4598        | -5752        | -6084        | -5873        | -5363        | -4726        | -4072       | -3461       |
| 14           | 5236      | 2812         | 613         | -3046        | -5454        | -6673        | -6972        | -6675        | -6055        | -5306        | -4551       | -3852       |
| 15           | 5305      | 2690         | 263         | -3726        | -6329        | -7610        | -7878        | -7486        | -6752        | -5891        | -5032       | -4245       |
| 16           | 5362      | 2531         | -101        | -4422        | -7217        | -8560        | -8787        | -8305        | -7455        | -6478        | -5514       | -4638       |
| 17           | 5411      | 2361         | -476        | -5129        | -8119        | -9519        | -9706        | -9129        | -8162        | -7068        | -5999       | -5033       |
| 18           | 5454      | 2185         | -860        | -5845        | -9028        | -10487       | -10632       | -9957        | -8872        | -7660        | -6485       | -5428       |
| 19           | 5489      | 2001         | -1249       | -6570        | -9946        | -11460       | -11563       | -10789       | -9584        | -8253        | -6972       | -5824       |
| 20           | 5520      | 1812         | -1644       | -7300        | -10868       | -12439       | -12497       | -11623       | -10298       | -8848        | -7459       | -6220       |
| $\infty$     | $-1\pm 7$ | $-223\pm 15$ | $-406\pm 6$ | $-775\pm 26$ | $-942\pm 12$ | $-996\pm 12$ | $-960\pm 20$ | $-851\pm 10$ | $-718\pm 10$ | $-608\pm 10$ | $-495\pm 8$ | $-399\pm 3$ |

**Table S3** Evolution with oligomer size of the  $\Delta r$  at the center of H-(BN)<sub>N</sub>-H oligomers optimized at different levels of theory. Values are given in Å

| <i>N</i> | 6-31G  |        | 6-311G** |        | <i>aug-cc-pVDZ</i> |        |
|----------|--------|--------|----------|--------|--------------------|--------|
|          | RHF    | MP2    | RHF      | MP2    | RHF                | MP2    |
| 3        | 0.1088 | 0.1213 | 0.1174   | 0.1171 | 0.1141             | 0.111  |
| 4        | 0.0903 | 0.1074 | 0.0975   | 0.1021 | 0.0946             | 0.0963 |
| 5        | 0.0744 | 0.0948 | 0.0804   | 0.0901 | 0.0780             |        |
| 6        | 0.0632 | 0.0851 | 0.0681   | 0.0781 |                    |        |
| 7        | 0.0525 | 0.0748 | 0.0567   | 0.0676 |                    |        |
| 8        | 0.0447 | 0.0669 | 0.0482   | 0.0594 |                    |        |
| 9        | 0.0375 | 0.0588 | 0.0404   | 0.0514 |                    |        |
| 10       | 0.0320 | 0.0524 | 0.0347   | 0.0454 |                    |        |
| 11       | 0.0271 | 0.0462 | 0.0293   |        |                    |        |
| 12       | 0.0234 | 0.0412 | 0.0253   |        |                    |        |
| 13       | 0.0199 | 0.0368 |          |        |                    |        |
| 14       | 0.0174 | 0.0324 |          |        |                    |        |
| 15       | 0.0150 | 0.0287 |          |        |                    |        |
| 16       | 0.0131 | 0.0253 |          |        |                    |        |
| 17       | 0.0114 | 0.0228 |          |        |                    |        |
| 18       | 0.0101 | 0.0205 |          |        |                    |        |
| 19       | 0.0088 |        |          |        |                    |        |
| 20       | 0.0079 |        |          |        |                    |        |
| 21       | 0.0070 |        |          |        |                    |        |
| 22       | 0.0062 |        |          |        |                    |        |
| 23       | 0.0056 |        |          |        |                    |        |
| 24       | 0.0050 |        |          |        |                    |        |
| 25       | 0.0046 |        |          |        |                    |        |
